# Supplementary material for: DROSHA is recruited to DNA damage sites by the MRN complex to promote non-homologous end joining
Source: PubMed Central journal article supplement (PMC8015226; doi:10.1242/jcs.249706), 2021-03-22
Supplement: joces-134-249706-s1.pdf [file joces-134-249706-s1.pdf]

# A SUPPLEMENTARY FIGURE 1

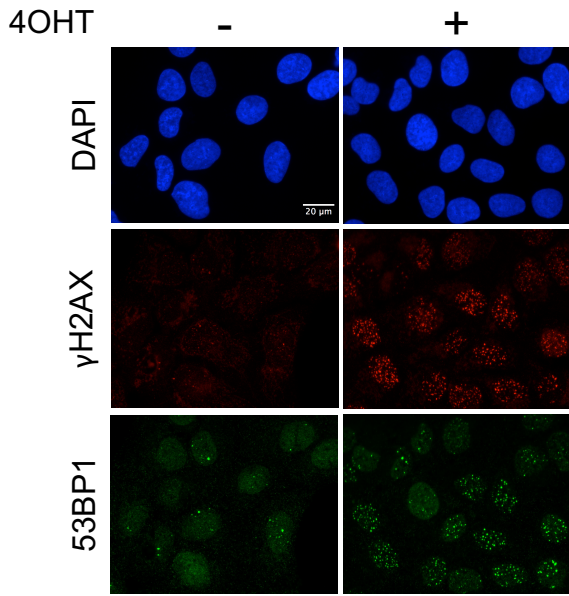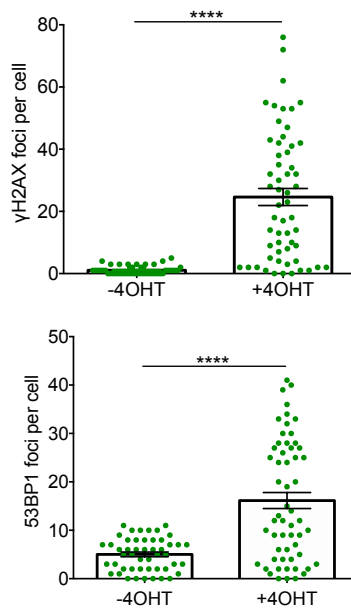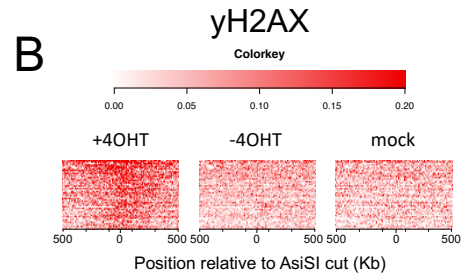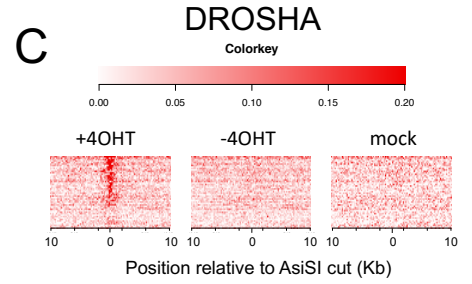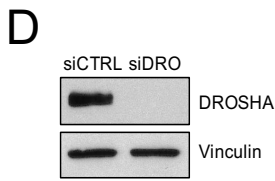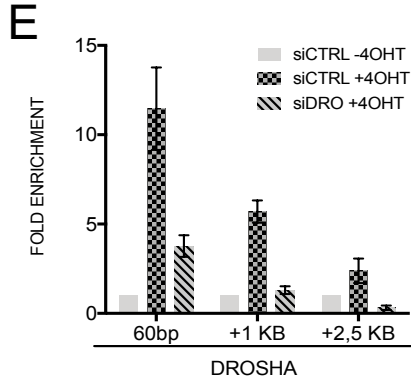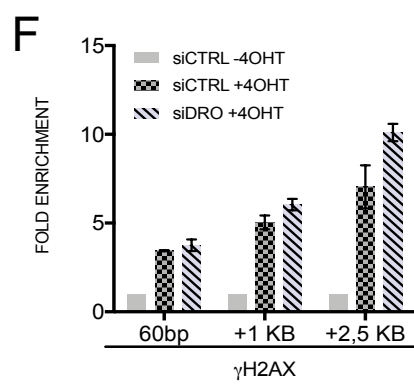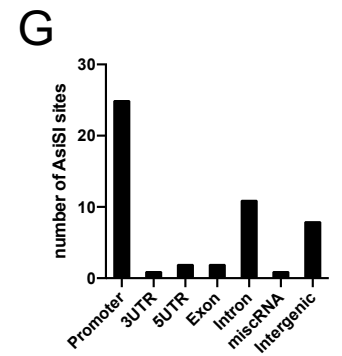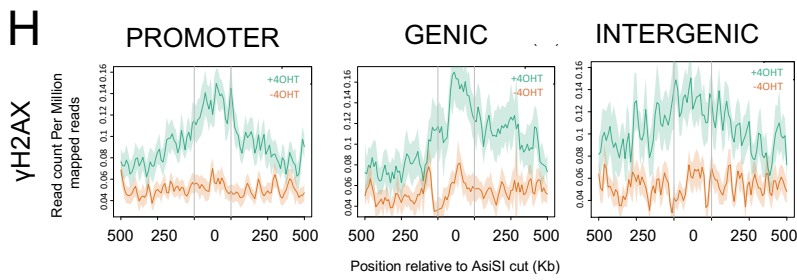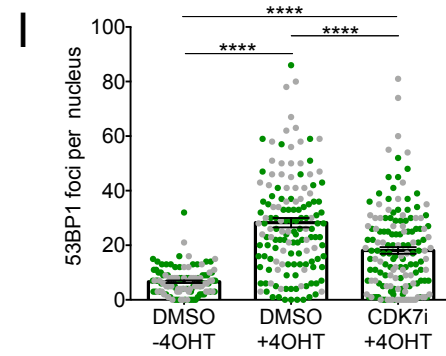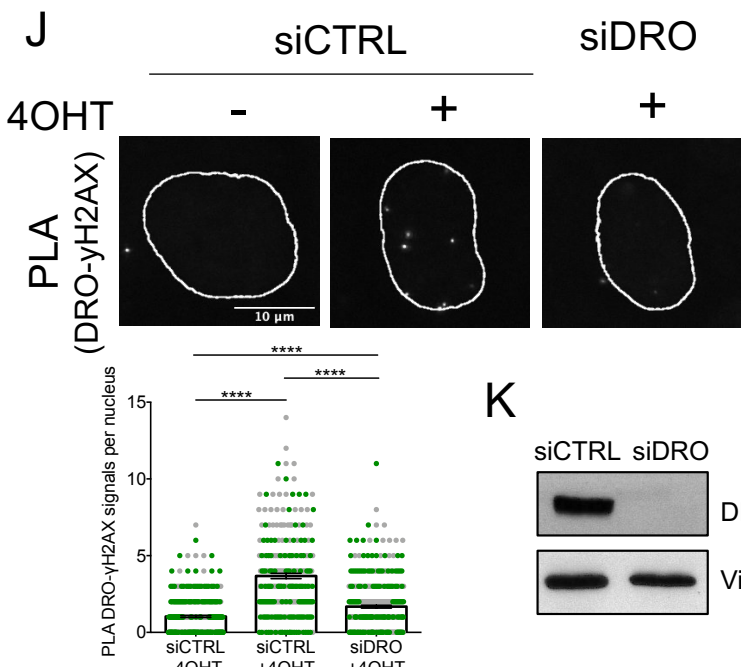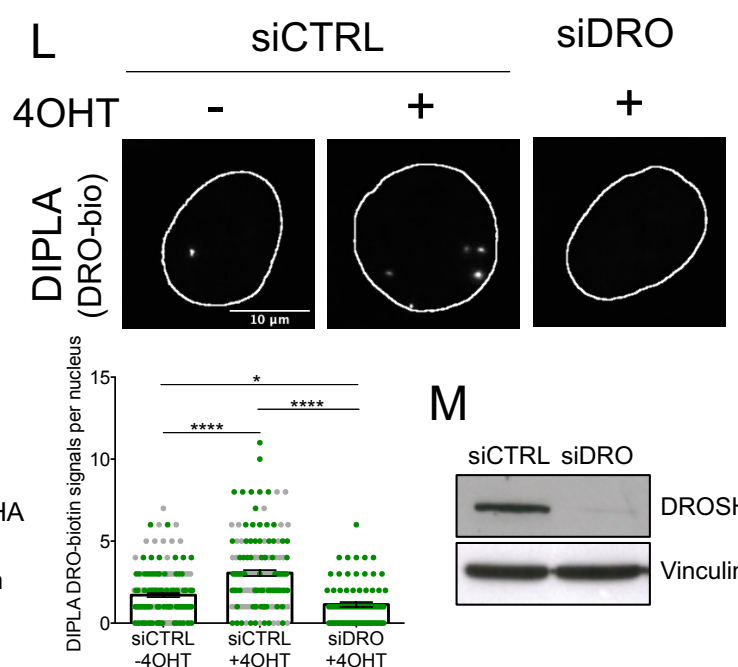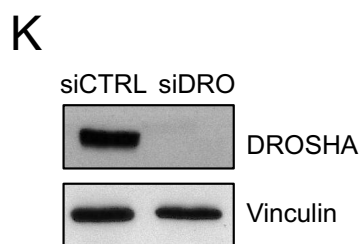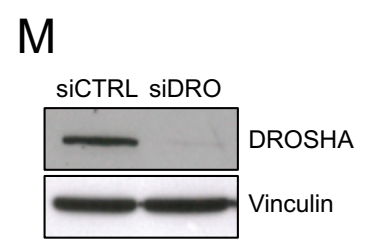

### Figure S1 | DROSHA accumulates to sites of DNA damage

**A)** DivA cells, were co-stained with DAPI,  $\gamma$ H2AX and 53BP1, before and after 4OHT treatment (4 h). Scatter plots show the number of  $\gamma$ H2AX or 53BP1 foci measured using Cell Profiler software. The black bars represent the mean  $\pm$  SEM (50 cells, n=1). P-values calculated by Student's t-test. \*\*\*\*P $\leq$ 0,0001 **B)** Heatmap representation of  $\gamma$ H2AX ChIP-seq signal across the 50 AsiSI sites reported in the plot in Figure 1A, sorted by increasing signal, over a 1 Mb window. **C)** Heatmap representation of DROSHA ChIP-seq signal across the 50 AsiSI sites reported in the plot in Figure 1B, sorted by DROSHA increasing signal over a 20 Kb window. **D)** DivA cells were transfected with non-targeting siRNA (siCTRL) or DROSHA (siDRO). 72h later, KD efficiency was evaluated by western blotting. Vinculin was used as loading control. **E-F)** The bar plot shows the fold enrichment, relative to the uncut (-4OHT), of DROSHA (**E**) and  $\gamma$ H2AX (**F**) as detected by ChIP-qPCR in cut (+4OHT), uncut (-4OHT) DivA cells and cut DivA cells knock-down for DROSHA (siDRO), with primers matching 60bp, 1Kb or 2,5Kb far from DSB-II (representative experiment, n=2). **G)** The bar plot shows the distribution of the top50 AsiSI sites according to the genetic context in which they have been mapped. **H)** Averaged  $\gamma$ H2AX ChIP-seq signal of 8 AsiSI sites positioned in a region annotated as a Promoter, Genic or Intergenic over 1 Mb window and centered at the AsiSI site, are shown for cut (+4OHT, green), uncut (-4OHT, red) or mock (magenta) samples. All the AsiSI sites above are included in the most cut AsiSI sites (Iannelli *et al.* 2017). **I)** The scatter plot represents the number of 53BP1 foci measured using Cell Profiler automated software in uncut (-4OHT), cut (+4OHT) DivA cells treated with 1 $\mu$ M CDK7i or mock treated with DMSO. The black bars represent the mean  $\pm$  SEM (150 cells, n=2). \*\*\*\*P $\leq$ 0,0001 using one-way ANOVA with multiple comparison. **J)** Representative images of PLA signal of  $\gamma$ H2AX-DROSHA proximity in cut (+4OHT) and uncut (-4OHT) DivA cells and cut DivA cells knock-down for DROSHA (siDRO). The scatter plot represents the number of PLA signals measured using Cell Profiler automated software. The black bars represent the mean  $\pm$  SEM (300 cells, n=2). \*\*\*\*P $\leq$ 0,0001 using by one-way ANOVA with multiple comparison. **K)** DivA cells were transfected with non-targeting siRNA (siCTRL) or siRNA against DROSHA (siDRO). 72h later, KD efficiency was evaluated by western blotting. Vinculin was used as loading control. **L)** Representative images of DIPLA signal of DNA ends-DROSHA proximity in cut (+4OHT) and uncut (-4OHT) DivA cells and cut DivA cells knock-down for DROSHA (siDRO). The scatter plot represents the number of DIPLA signals measured using Cell Profiler automated software. The black bars represent the mean  $\pm$  SEM (150 cells, n=2). \*P $\leq$ 0,05 \*\*\*\*P  $\leq$ 0,0001 using one-way ANOVA with multiple comparison. **M)** DivA cells were transfected with non-targeting siRNA (siCTRL) or siRNA against DROSHA (siDRO). 72h later, KD efficiency was evaluated by western blotting. Vinculin was used as loading control.

## SUPPLEMENTARY FIGURE 2

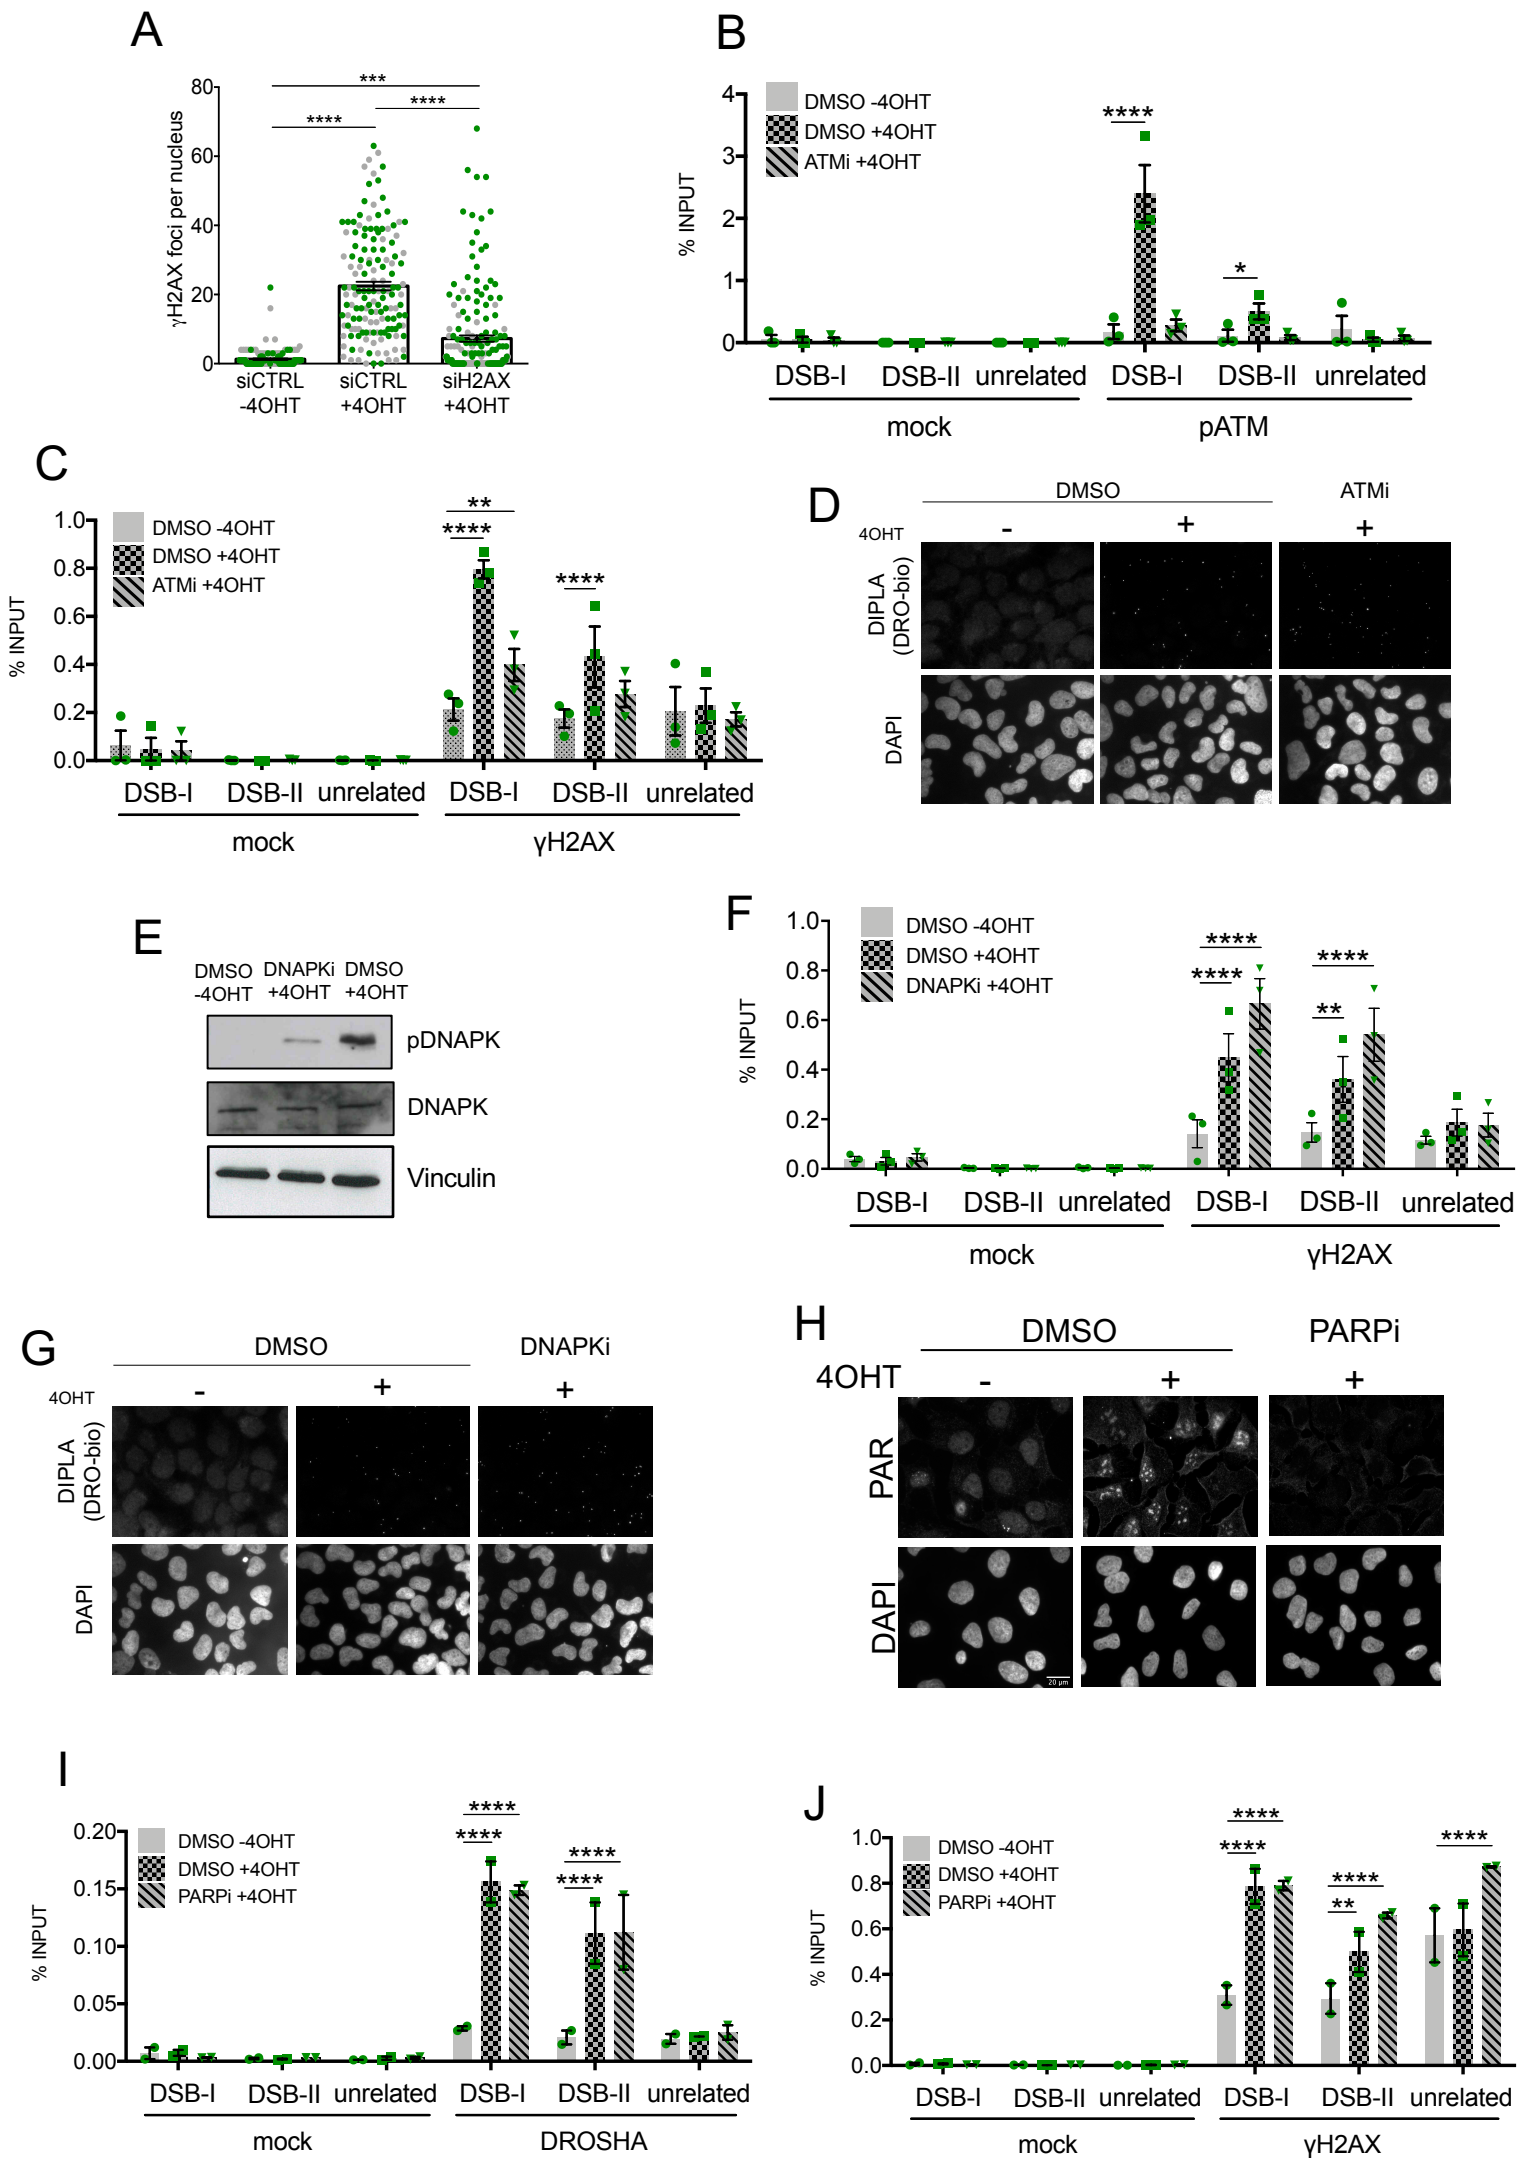

**Figure S2 | DROSHA recruitment at DNA damage sites occurs independently from H2AX and DDR signalling activation.**

**A)** DivA cells were transfected with non-targeting siRNA (siCTRL) or siRNA against H2AX (siH2AX). 72h later, KD efficiency was evaluated by immunofluorescence for  $\gamma$ H2AX. The scatter plot represents the number of  $\gamma$ H2AX foci measured using Cell Profiler automated software. The black bars represent the mean  $\pm$  SEM (300 cells, n=2). \*\*\* $P \leq 0,001$  \*\*\*\* $P \leq 0,0001$  \*\*\*\* $P \leq 0,0001$  using one-way ANOVA with multiple comparison. **B-C)** The bar plot shows the percentage of enrichment, relative to the input, of mock (no antibody), pATM (**B**) and  $\gamma$ H2AX (**C**) as detected by ChIP-qPCR in cut (+4OHT), uncut (-4OHT) DivA cells and cut DivA cells treated with ATM inhibitor (ATMi), with primers matching DSB-I, DSB-II or a genomic region far from any annotated AsiSI sites. Error bars indicate SEM among 3 independent experiments. \* $P \leq 0,05$  \*\* $P \leq 0,01$  \*\*\*\* $P \leq 0,0001$  using 2way ANOVA with multiple comparison.

**D)** Representative images of DIPLA signal of biotin-DROSHA interaction in cut (+4OHT) and uncut (-4OHT) DivA cells and cut DivA cells treated with ATM inhibitor (ATMi). **E)** DivA cells were mock treated with DMSO or treated with DNAPKi 1h prior to 4OHT induction. DNAPKi efficiency was evaluated by western blotting. Vinculin was used as loading control. **F)** The bar plot shows the percentage of enrichment, relative to the input, of mock (no antibody) and  $\gamma$ H2AX as detected by ChIP-qPCR in cut (+4OHT), uncut (-4OHT) DivA cells and cut DivA cells treated with DNAPK inhibitor (DNAPKi), with primers matching DSB-I, DSB-II or a genomic region far from any annotated AsiSI sites. Error bars indicate SEM among 3 independent experiments. \*\* $P \leq 0,01$  \*\*\*\* $P \leq 0,0001$  using 2way ANOVA with multiple comparison.

**G)** Representative images of DIPLA signal of biotin-DROSHA interaction in cut (+4OHT) and uncut (-4OHT) DivA cells and cut DivA cells treated with DNAPK inhibitor (DNAPKi).

**H)** DivA cells were mock treated with DMSO or treated with PARPi 1h prior to 4OHT induction. PARPi efficiency was evaluated by immunofluorescence for PAR. **I-J)** The bar plot shows the percentage of enrichment, relative to the input, of mock (no antibody) and DROSHA (**I**) or  $\gamma$ H2AX (**J**) as detected by ChIP-qPCR in cut (+4OHT), uncut (-4OHT) DivA cells and cut DivA cells treated with PARP inhibitor (PARPi), with primers matching DSB-I, DSB-II or a genomic region far from any annotated AsiSI sites. Error bars indicate SEM among 2 independent experiments. \*\* $P \leq 0,01$  \*\*\*\* $P \leq 0,0001$  using 2way ANOVA with multiple comparison.

### SUPPLEMENTARY FIGURE 3

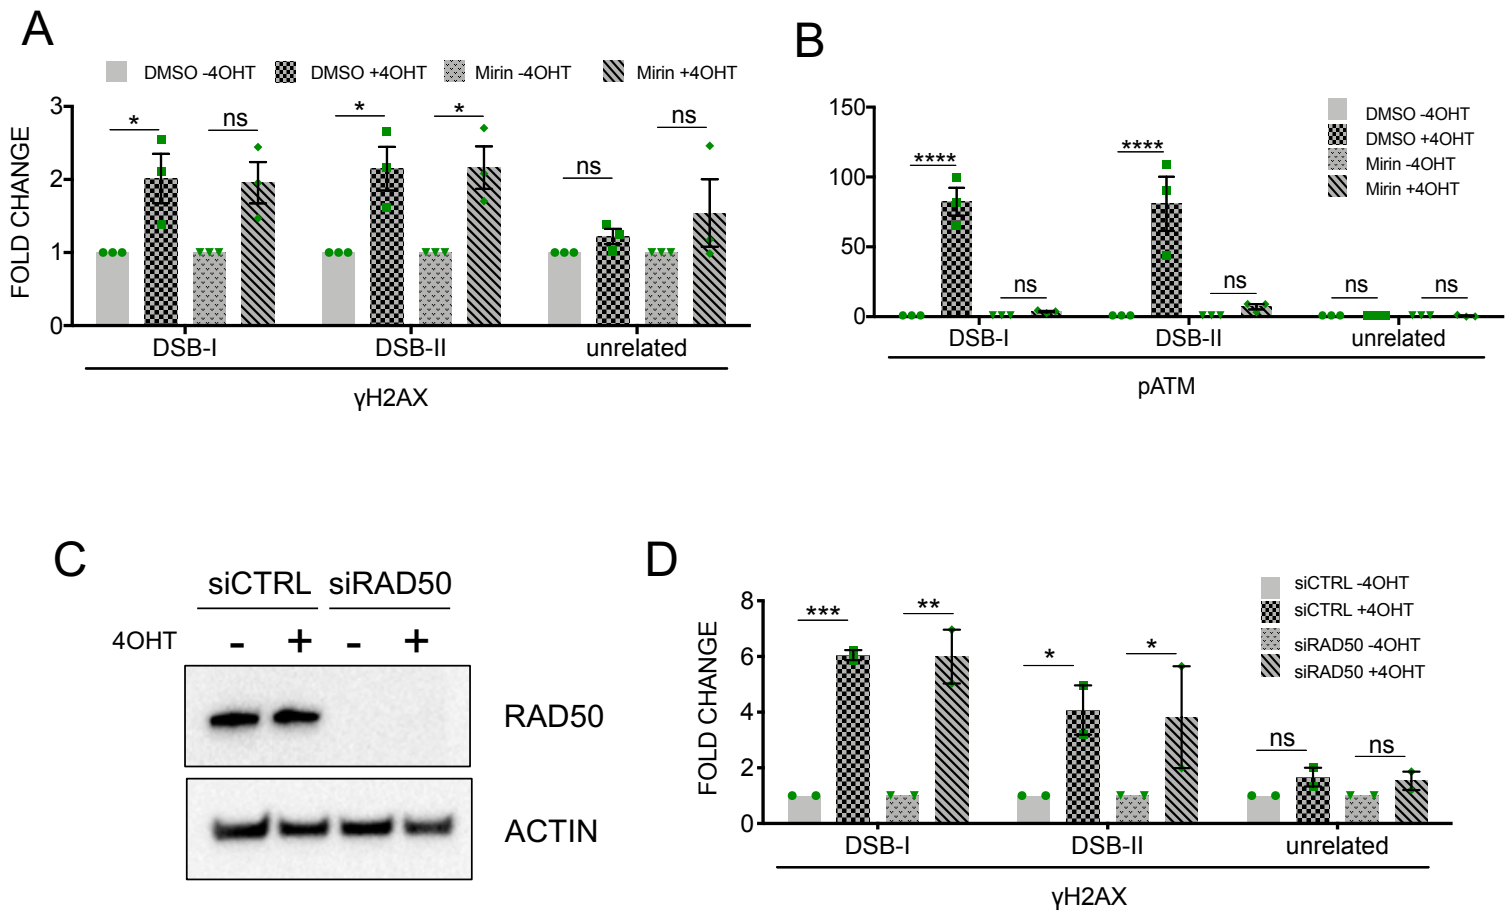

**Figure S3 | MRN complex support DROSHA recruitment to DNA damage site while ongoing transcription is not required.**

**A-B)** The bar plot shows the fold enrichment, relative to the uncut (-4OHT), of  $\gamma$ H2AX (**A**) or pATM (**B**) as detected by ChIP-qPCR in cut (+4OHT) and uncut (-4OHT) DivA cells treated with Mirin (100  $\mu$ M) or mock treated with DMSO, with primers matching DSB-I, DSB-II or a genomic region far from any annotated AsiSI sites. Error bars indicate SEM among 3 independent experiments. \* $P \leq 0,05$  \*\*\*\* $P \leq 0,0001$  using 2way ANOVA with multiple comparison. **C)** DivA cells were transfected with non-targeting siRNA (siCTRL) or RAD50 (siRAD50). 72h later, KD efficiency was evaluated by western blotting. Vinculin was used as loading control. **D)** The bar plot shows the fold enrichment, relative to the uncut (-4OHT), of  $\gamma$ H2AX as detected by ChIP-qPCR in cut (+4OHT) and uncut (-4OHT) DivA cells knocked down for RAD50 (siRAD50) or mock treated with non-targeting siRNA (siCTRL), with primers matching DSB-I, DSB-II or a genomic region far from any annotated AsiSI sites. Error bars indicate SEM among 2 independent experiments. \* $P \leq 0,05$  \*\* $P \leq 0,01$  \*\*\* $P \leq 0,001$ .

## SUPPLEMENTARY FIGURE 4

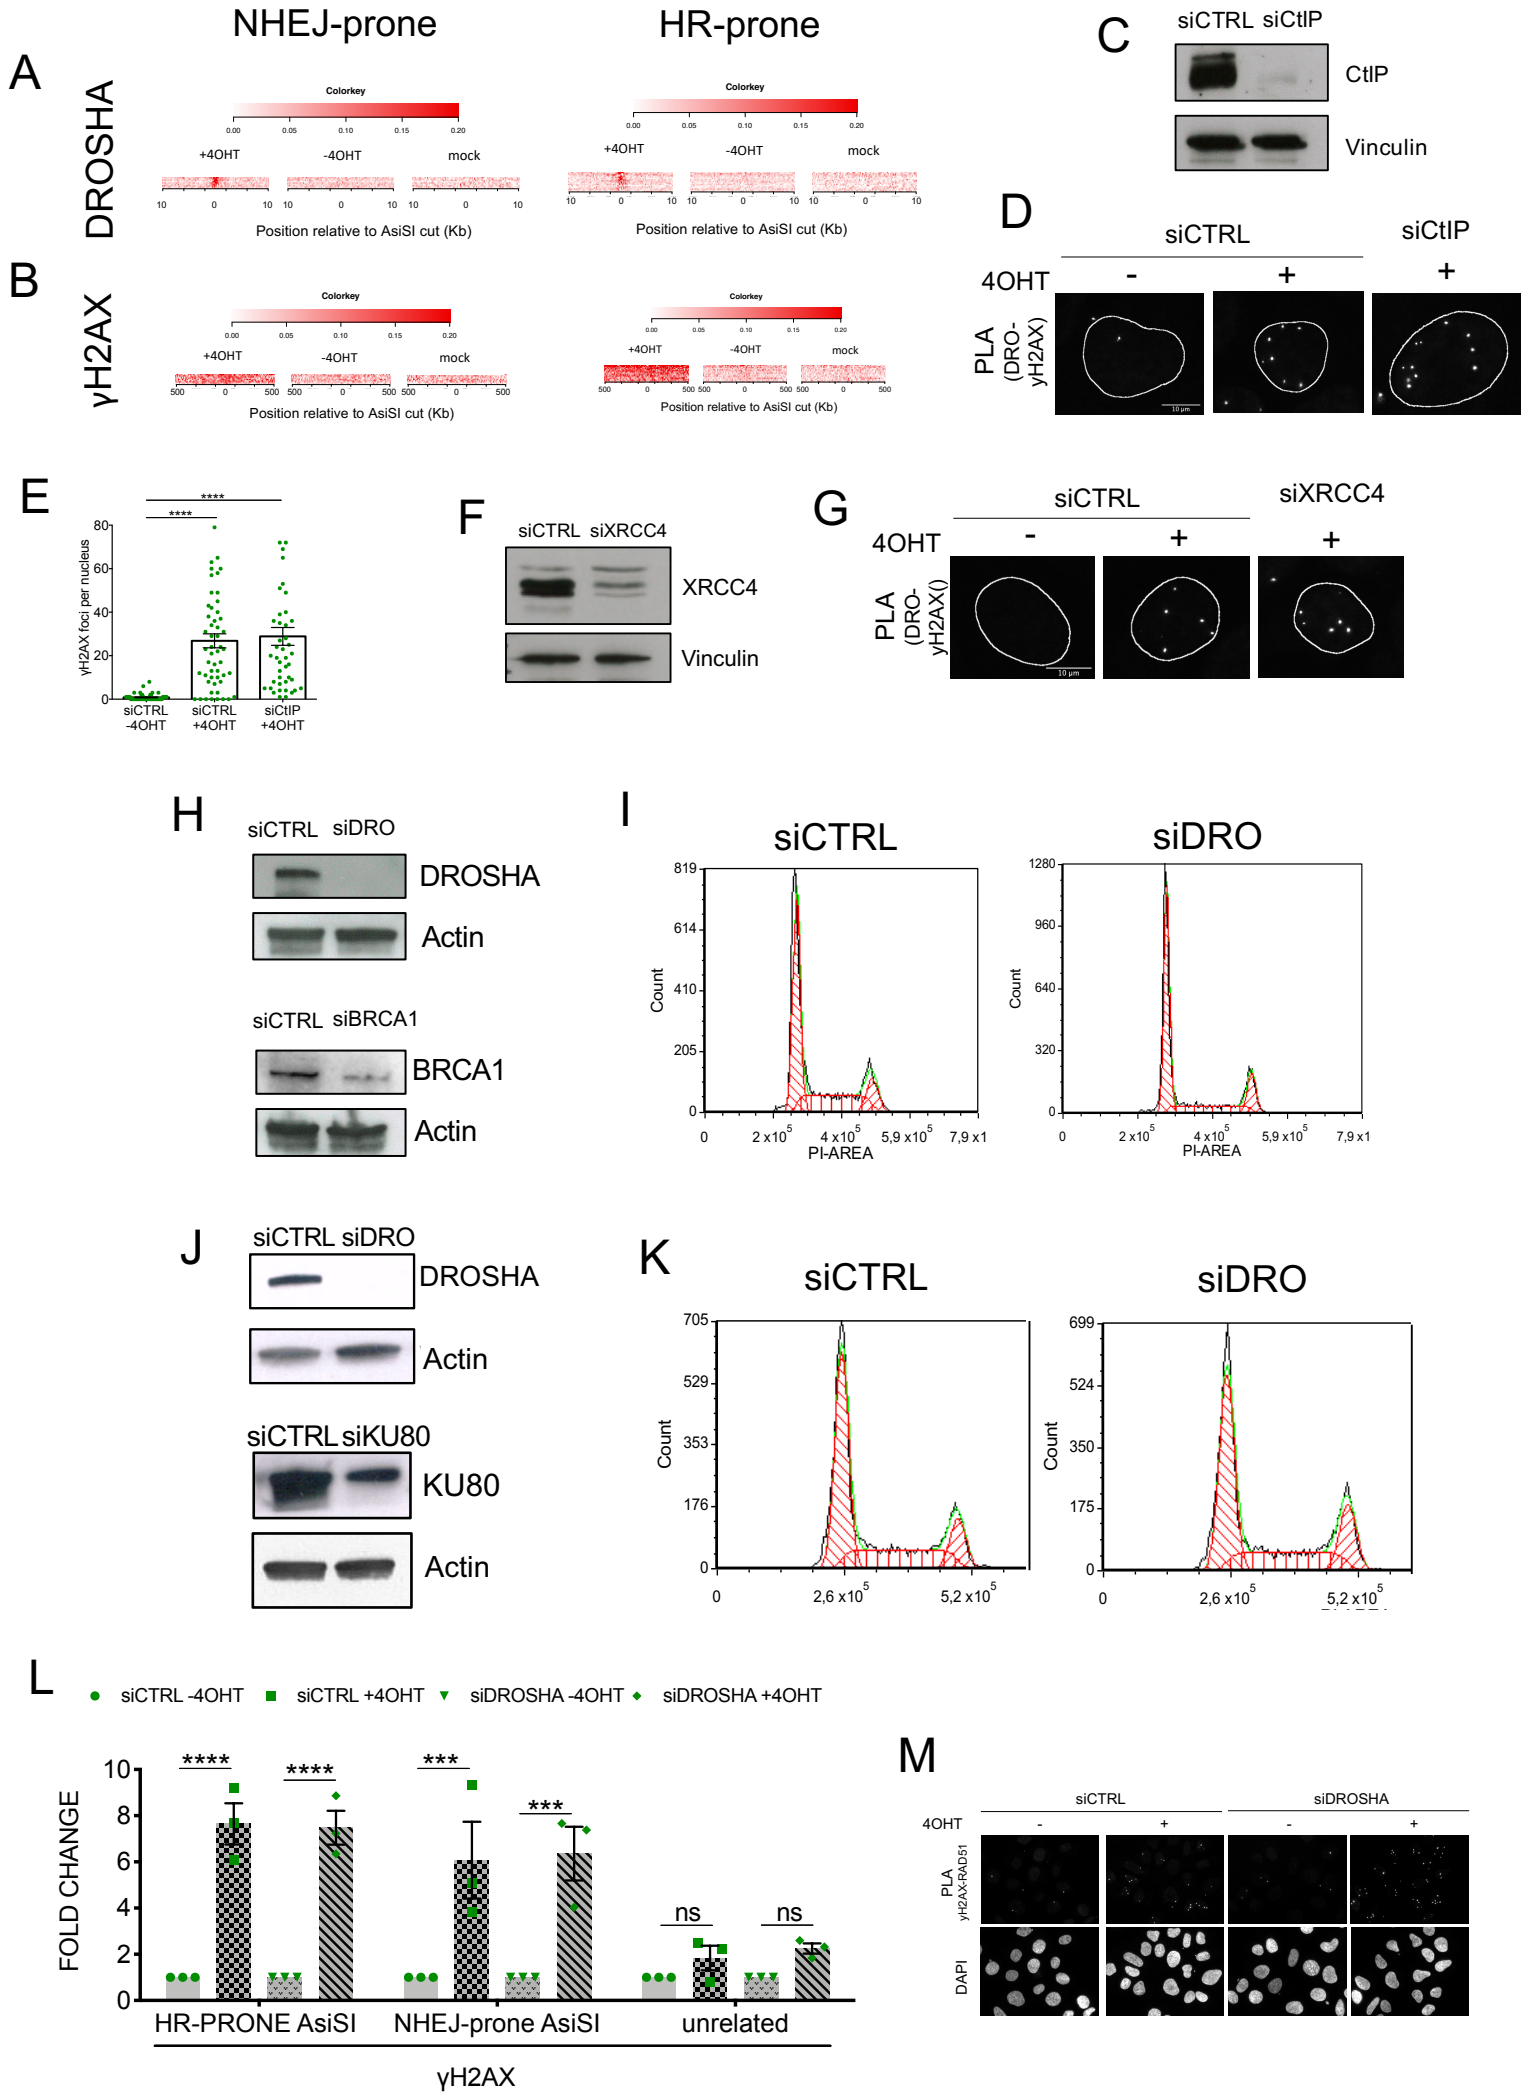

## Figure S4 | DROSHA recruitment to DSBs occurs throughout the cell cycle and preferentially at NHEJ-prone DSBs.

**A-B)** Heatmap representation of DROSHA (**A**) or  $\gamma$ H2AX (**B**) signal across the AsiSI sites reported in the plot in Figure 4C and 4B, over a 20Kb window or 1 Mb respectively. **C)** DlvA cells were transfected with non-targeting siRNA (siCTRL) or siRNA against CtIP (siCtIP). 72h post transfection, knock-down efficiency was evaluated by western blotting. Vinculin was used as loading control. **D)** Representative images of PLA signal of  $\gamma$ H2AX-DROSHA interaction in cut (+4OHT) and uncut (-4OHT) DlvA cells and cut DlvA cells knock down for CtIP (siCtIP). **E)** The scatter plot represents the number of  $\gamma$ H2AX foci evaluated by immunofluorescence, measured using Cell Profiler automated software, in DlvA cells transfected with non-targeting siRNA (siCTRL) or siRNA against CtIP (siCtIP). The black bars represent the mean  $\pm$  SEM (100 cells, n=1). \*\*\*\*P  $\leq$  0,0001 using one-way ANOVA with multiple comparison. **F)** DlvA cells were transfected with control siRNA (siCTRL) or siRNA against XRCC4 (siXRCC4). 72h post transfection, knock-down efficiency was evaluated by western blotting. Vinculin was used as loading control. **G)** Representative images of PLA signal of  $\gamma$ H2AX-DROSHA interaction in cut (+4OHT) and uncut (-4OHT) DlvA cells and cut DlvA cells knock down for XRCC4 (siXRCC4). **H)** U2OS DR-GFP cells were transfected with non-targeting siRNA (siCTRL), siRNA against DROSHA (siDRO) or siRNA against BRCA1 (siBRCA1). Knock-down efficiency was evaluated by western blotting. Actin was used as loading control. **I)** FACS profiles of U2OS DR-GFP cells transfected with siRNA against DROSHA (siDRO) or mock transfected with non-targeting siRNA (siCTRL). **J)** U2OS EJ5-GFP cells were transfected with non-targeting siRNA (siCTRL), siRNA against DROSHA (siDRO) or siRNA against KU80 (siKU80). Knock-down efficiency was evaluated by western blotting. Actin was used as loading control. **K)** FACS profiles of U2OS EJ5 cells transfected with siRNA against DROSHA or mock transfected with control siRNA (siCTRL). **L)** The bar plot shows the fold enrichment, relative to the uncut (-4OHT), of  $\gamma$ H2AX as detected by CHIP-qPCR in cut (+4OHT) and uncut (-4OHT) DlvA cells knocked down for DROSHA (siDROSHA) or mock treated with non-targeting siRNA (siCTRL), with primers matching a NHEJ-prone ASiSI site, a HR-prone ASiSI site or a genomic region far from any annotated AsiSI sites. Error bars indicate SEM among 3 independent experiments. \*\*\*P  $\leq$  0,001 \*\*\*\*P  $\leq$  0,0001. **M)** Representative images of PLA signal of  $\gamma$ H2AX-RAD51 interaction in cut (+4OHT) and uncut (-4OHT) DlvA cells knock down for DROSHA (siDRO) or mock treated with non-targeting siRNA (siCTRL).



**Table S1 | List of Antibodies used**

| Antibody   | Company and product ID    | Host and Clonality | Applications |        |         |            |
|------------|---------------------------|--------------------|--------------|--------|---------|------------|
|            |                           |                    | ChIP/ IP     | IF     | WB      | PLA/ DIPLA |
| 53BP1      | Bethyl, A303-906A         | goat, polyclonal   |              | 1:2000 |         |            |
| 53BP1      | Novus Biological, 100-305 | rabbit, polyclonal | 1.5ug        |        |         | 1:2000     |
| γH2AX      | Millipore, 05-636         | mouse, monoclonal  |              | 1:2000 |         | 1:2000     |
| γH2AX      | Abcam, ab2893             | rabbit, polyclonal | 2ug          |        |         |            |
| RNAPII     | Abcam, ab817              | mouse, monoclonal  |              |        | 1:1000  |            |
| Biotin     | Sigma-Aldrich, B7653      | mouse, monoclonal  |              |        |         | 1:2000     |
| CtIP       | Active Motif, 61142       | mouse, monoclonal  |              |        | 1:1000  |            |
| DROSHA     | Cell Signaling, 3364S     | rabbit, monoclonal | 5ul          |        | 1:1000  | 1:1000     |
| pATM       | Rockland, 200-301-400     | mouse, monoclonal  | 2ug          |        |         |            |
| RAD50      | Millipore 05-525          | mouse, monoclonal  | 5ug          |        | 1:1000  |            |
| NBS1       | Millipore, 04-236         | rabbit, polyclonal |              |        | 1:500   |            |
| MRE11      | Not commercial            | rabbit, polyclonal |              |        | 1:1000  |            |
| pDNAPK     | Abcam, ab124918           | rabbit, monoclonal |              |        | 1:2000  |            |
| DNAPK      | Santa Cruz, Sc5282        | mouse, monoclonal  |              |        | 1:1000  |            |
| PAR chains | Santa Cruz, Sc56198       | mouse, monoclonal  |              | 1:100  |         |            |
| Vinculin   | Millipore, MAB3574        | mouse, monoclonal  |              |        | 1:1000  |            |
| Xrcc4      | Abcam, ab145              | rabbit, polyclonal |              |        | 1:2000  |            |
| BRCA1      | Santa Cruz, sc646         | rabbit, polyclonal |              |        | 1:250   |            |
| RAD51      | Santa Cruz, sc8349        | rabbit, polyclonal | 2ug          |        |         | 1:500      |
| KU80       | Not commercial            | Rb                 |              |        | 1:10000 |            |
| Actin      | Sigma-Aldrich, A5441      | mouse, monoclonal  |              |        | 1:5000  |            |

**Table S2 | List of qPCR primers used**

| <b>NAME</b>             | <b>SEQUENCE</b>      |
|-------------------------|----------------------|
| DSB I proximal site FW  | GATTGGCTATGGGTGTGGAC |
| DSB I proximal site RV  | CATCCTTGCAAACCAGTCCT |
| DSB II proximal site FW | CCCTGGAGGTAGGTCTGGT  |
| DSB II proximal site RV | CGCACACTCACTGGTTCCT  |
| distal site FW          | CCCATCTCAACCTCCACACT |
| distal site RV          | CTTGTCCAGATTCGCTGTGA |
| DSBII +1Kb FW           | AGCCTATGGGATTGGGAAAC |
| DSBII +1Kb RV           | GCCCTTTTCAACCATCTGAC |
| DSBII +2,5Kb FW         | CTCCCCCGAAATCACTTCT  |
| DSBII +2,5Kb RV         | AAGAAGGGCAAAGCATGAGA |
| NHEJ-prone site FW      | GGAAGGAGGGGCTACTAGGG |
| NHEJ-prone site RV      | GAAAGCCCCATTCAGTTTGA |
| HR-prone site FW        | CCGCCAGAAAGTTTCCTAGA |
| HR-prone site RV        | CTCACCTTGCAGCACTTG   |

**TableS3 | List of siRNA used**

| TARGET                               | SEQUENCE             |
|--------------------------------------|----------------------|
| Human DROSHA                         | CAACAUAGACUACACGAUU  |
|                                      | CCAACUCCUCGAGGAUUA   |
|                                      | GGCCAACUGUUUAGAAUA   |
|                                      | GAGUAGGCUUCGUGACUUA  |
| Human H2AX                           | GGGACGAAGCACUUGGUAA  |
|                                      | CGACUAGAACCUUAGGCAU  |
|                                      | GGAAAGAGCUGAGCCGCUU  |
|                                      | GAACUGGAAUUCUGCAGCU  |
| CONTROL<br>(non-targeting sequences) | UGGUUUACAUGUCGACUAA  |
|                                      | UGGUUUACAUGUUGUGUGA  |
|                                      | UGGUUUACAUGUUUUCUGA  |
|                                      | UGGUUUACAUGUUUCCUA   |
| Human XRCC4                          | UGACCGAGAUCCAGUCUAU  |
|                                      | GAACCCAGUAUAACUCAUU  |
|                                      | CAGCUGAUGUAUACACGUU  |
|                                      | CCUCUUUGAUGAGAUUUAA  |
| Human CtIP                           | GGAGCUACCUCUAGUAUCA  |
|                                      | GAGGUUAUAUUAAGGAAGA  |
|                                      | GAACAGAAUAGGACUGAGU  |
|                                      | GCACGUUGCCCAAAGAUUC  |
| Human KU80                           | GCAUGGAUGUGAUUCAACA  |
|                                      | CGAGUAACCAGCUCAUAAA  |
|                                      | GAGCAGCGCUUUAACAACU  |
|                                      | AAACUUCGUGUUCUAGUG   |
| Human BRCA1                          | CAACAUGCCCACAGAUCAA  |
|                                      | CCAAAGCGAGCAAGAGAAU  |
|                                      | UGAUAAAGCUCCAGCAGGA  |
|                                      | GAAGGAGCUUUCAUCAUUC  |
| Human RAD50                          | ACAAGGAUCUGGAUAUUUU  |
|                                      | UAACCUCACUGUUGGGGAUA |
|                                      | GAAUUGAAUCGUAAGCUUA  |
|                                      | GACACAAGGUCAGAAAGUA  |
